# Supplementary material for: Cationic surfactant-triggered formation of a supramolecular hydrogel by a negatively chargedl-valine derivative
Source: Royal Society of Chemistry journal article supplement (doi:10.1039/b612478j), 2006-11-07
Supplement: b612478j.pdf [file b612478j.pdf]

## Electric Supplementary Information

### Cationic surfactant-triggered formation of supramolecular hydrogel by negatively charged L-valine derivative

Masahiro Suzuki,<sup>a\*</sup> Teruaki Sato,<sup>b</sup> Hirofusa Shirai,<sup>b</sup> and Kenji Hanabusa<sup>a</sup>

<sup>a</sup>Graduate School of Science and Technology, Shinshu University, Ueda, Nagano 386-8567, Japan.

<sup>b</sup>Department of Functional Polymer Science, Faculty of Textile Science and Technology, Shinshu University, Ueda, Nagano 386-8567, Japan.

Table S1. Hydrogelation Properties of S1/1 at 25°C.

| S/1 | S1        | S2        | S3        |
|-----|-----------|-----------|-----------|
| 0   | —         | —         | —         |
| 0.2 | <b>14</b> | <b>12</b> | <b>4</b>  |
| 0.4 | <b>2</b>  | <b>4</b>  | <b>4</b>  |
| 0.6 | <b>8</b>  | <b>10</b> | <b>6</b>  |
| 0.8 | P         | <b>4</b>  | <b>10</b> |
| 1.0 | P         | P         | <b>10</b> |
| 1.2 | <b>4</b>  | <b>10</b> | <b>10</b> |
| 1.4 | <b>4</b>  | <b>10</b> | <b>10</b> |
| 1.6 | <b>4</b>  | <b>10</b> | <b>10</b> |
| 1.8 | <b>4</b>  | <b>10</b> | —         |
| 2.0 | <b>8</b>  | <b>10</b> | —         |

Values denote minimum gel concentration necessary for hydrogelation (g/L). P: Precipitation. —: No hydrogelation.

Table S1 lists the minimum gel concentration necessary for hydrogelation (MGC, g/L) of 1 in the absence and presence of surfactants. 1 forms a hydrogel below 10 g/L in the presence of a cationic surfactant; especially, S1/1 (0.4) can gel water at 2 g/L.

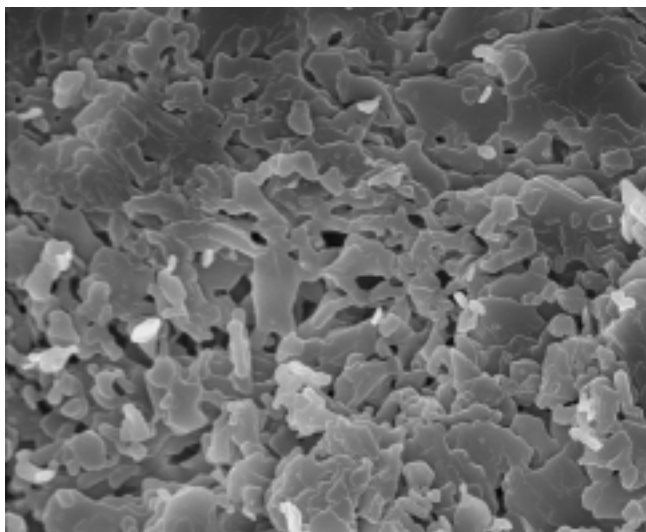

**Figure 1S.** FE–SEM image of the sample prepared from aqueous solution of DTMACl (32.0 mM)

Figure 1S shows the FE–SEM image of DTMACl in aqueous solution. Under the experimental conditions of hydrogelation, S1 did not form fibrous aggregates. Because **1** does not form a nanofiber in water, the presence of the cationic surfactants induce the formation of nanofibers and then creation of a three–dimensional network, leading to the formation of a hydrogel.
